# Supplementary material for: AAV9-mediated gene delivery of MCT1 to oligodendrocytes does not provide a therapeutic benefit in a mouse model of ALS
Source: PubMed Central journal article supplement — Mol Ther Methods Clin Dev. 2021 Jan 20;20:508–19. doi: 10.1016/j.omtm.2021.01.006 (PMC7878966; doi:10.1016/j.omtm.2021.01.006), 2021-01-20
Supplement: mmc1.pdf [file mmc1.pdf]

## **Supplemental Information**

### **AAV9-mediated gene delivery of MCT1 to oligodendrocytes does not provide a therapeutic benefit in a mouse model of ALS**

**Caroline Eykens, Elisabeth Rossaert, Sandra Duqué, Laura Rué, André Bento-Abreu, Nicole Hersmus, Annette Lenaerts, Axelle Kerstens, Nikky Corthout, Sebastian Munck, Philip Van Damme, Matthew G. Holt, Georg von Jonquires, Matthias Klugmann, Ludo Van Den Bosch, and Wim Robberecht**

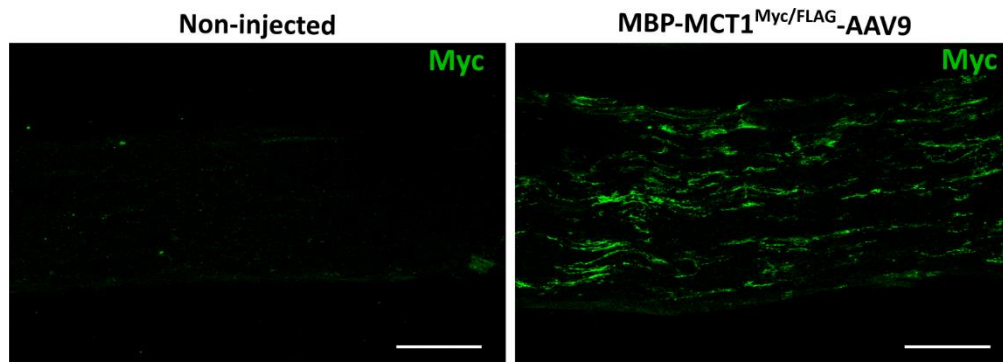

**Supplementary figure 1. Analysis of MCT1 expression in the sciatic nerve of wildtype mice following ICV delivery of the MBP-MCT1<sup>Myc/Flag</sup>-AAV9 vector.** Immunofluorescent staining for Myc in longitudinal sciatic nerve sections of non-injected versus MBP-MCT1<sup>Myc/Flag</sup>-AAV9-injected mice.

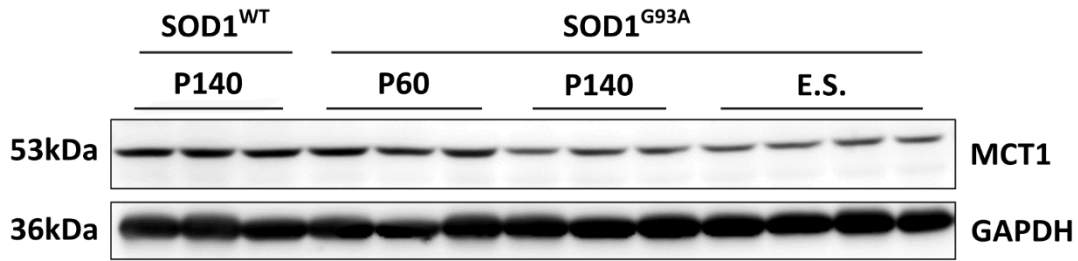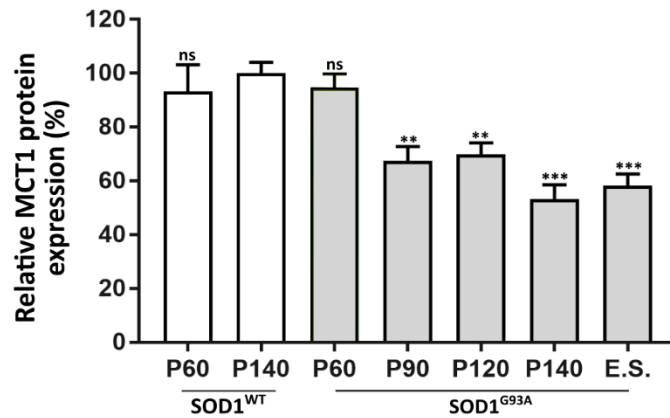

**Supplementary figure 2. MCT1 protein expression levels are reduced in the lumbar spinal cord of ALS mice as a function of disease.** Western blot for the oligodendrocyte marker MCT1 in SOD1<sup>G93A</sup> mice shows that MCT1 expression levels progressively decline relative to GAPDH with increasing age, starting from postnatal day 90 onwards. Data are presented as mean  $\pm$  SEM, n = 5-8 mice per group and data are normalized to SOD1<sup>WT</sup> P140. One-way ANOVA with Tukey's *post hoc* analysis, \*\*p<0.01; \*\*\*p<0.001; ns = non-significant compared with SOD1<sup>WT</sup> P140. E.S. = end-stage, between 150 and 160 days of age.
